# Supplementary material for: Association of Glycemic Variability, Stress Hyperglycemia Ratio, and Hemoglobin Glycation Index With 28-Day Mortality in Sepsis: A Multicenter Retrospective Study With Mediation and Machine-Learning Analyses
Source: Research Square preprint supplement (doi:10.21203/rs.3.rs-8247079/v1), 2025-12-17
Supplement: Supplementary file 1 [file 6e654dd56405d763f7e30385.xlsx]

## Sheet: Sheet1
Variable	Overall (N=7260)	Survivors (N=6102)	Non-survivors (N=1158)	p-value
Age,y	67.00 [57.00, 76.00]	66.00 [56.00, 75.00]	71.50 [61.00, 81.00]	<0.001
Gender (Female), (%)	2740 (37.74%)	2273 (37.25%)	467 (40.33%)	0.05
BMI, (kg/m2)	29.02 [24.78, 34.10]	29.21 [24.96, 34.13]	27.91 [23.86, 34.05]	<0.001
Race, (%)
Asian	180 (2.48%)	151 (2.47%)	29 (2.50%)	<0.001
Black	797 (10.98%)	677 (11.09%)	120 (10.36%)
Other	1927 (26.54%)	1540 (25.24%)	387 (33.42%)
White	4356 (60.00%)	3734 (61.19%)	622 (53.71%)
Severity of illness
SOFA	6.00 [4.00, 8.00]	6.00 [4.00, 8.00]	7.00 [5.00, 10.00]	<0.001
OASIS	32.00 [26.00, 38.00]	31.00 [26.00, 37.00]	35.00 [28.00, 41.00]	<0.001
Charlson	5.00 [3.00, 7.00]	5.00 [3.00, 7.00]	6.00 [4.00, 8.00]	<0.001
Comorbidities
Hypertension, (%)	2727 (37.56%)	2420 (39.66%)	307 (26.51%)	<0.001
Diabetes, (%)	2524 (34.77%)	2136 (35.00%)	388 (33.51%)	0.34
COPD, (%)	495 (6.82%)	383 (6.28%)	112 (9.67%)	<0.001
HF, (%)	2449 (33.73%)	2029 (33.25%)	420 (36.27%)	0.05
Stroke, (%)	1262 (17.38%)	894 (14.65%)	368 (31.78%)	<0.001
Vital signs
MAP,mmHg	59.00 [53.00, 66.00]	59.00 [53.00, 66.00]	59.00 [51.00, 66.00]	0.08
Heart rate, beats/min	101.00 [89.00, 115.27]	100.00 [89.00, 114.00]	105.00 [90.00, 123.88]	<0.001
Respiratory rate, times/min	28.00 [24.00, 32.00]	27.00 [24.00, 32.00]	30.00 [25.30, 34.31]	<0.001
Temperature, °C	37.39 [37.00, 37.90]	37.38 [37.00, 37.89]	37.39 [36.98, 38.11]	0.14
Laboratory
Hb, g/dL	9.60 [8.00, 11.50]	9.60 [8.00, 11.40]	9.90 [8.00, 12.00]	<0.001
Wbc, 10^9/L	13.70 [10.00, 18.30]	13.70 [10.00, 18.20]	13.90 [9.90, 19.50]	<0.05
Plt, 10^9/L	159.00 [113.00, 224.00]	157.00 [113.00, 221.00]	170.50 [111.25, 233.75]	<0.05
Lac, mmol/L	2.30 [1.50, 3.58]	2.30 [1.50, 3.47]	2.50 [1.40, 4.32]	<0.001
Tbil, mg/dL	0.70 [0.40, 1.50]	0.70 [0.30, 1.50]	0.70 [0.40, 1.40]	<0.05
AST, U/L	53.00 [25.00, 137.00]	53.13 [25.00, 137.00]	49.00 [26.00, 135.52]	0.73
ALT, U/L	34.00 [16.00, 88.61]	34.00 [15.90, 89.00]	33.00 [16.00, 86.77]	0.45
Cre, mg/dl	1.10 [0.80, 1.70]	1.00 [0.80, 1.60]	1.30 [0.90, 2.20]	<0.001
Blood glucose
FBG, mg/dl	137.00 [110.00, 190.00]	134.00 [109.00, 184.00]	156.00 [116.00, 223.50]	<0.001
Hba1c, %	6.00 [5.50, 7.00]	6.00 [5.50, 7.00]	6.00 [5.50, 7.00]	0.58
GV	23.03 [16.69, 32.00]	22.56 [16.40, 31.12]	26.00 [18.07, 35.79]	<0.001
SHR	1.10 [0.88, 1.40]	1.07 [0.87, 1.36]	1.22 [0.95, 1.59]	<0.001
HGI	-0.38 [-0.87, 0.37]	-0.37 [-0.84, 0.39]	-0.48 [-1.05, 0.27]	<0.001
Interventions
Mechanical ventilation , (%)	4301 (59.24%)	3621 (59.34%)	680 (58.72%)	0.72
RRT , (%)	284 (3.91%)	198 (3.24%)	86 (7.43%)	<0.001
Vaso , (%)	3613 (49.77%)	3079 (50.46%)	534 (46.11%)	<0.01
Insulin , (%)	3988 (54.93%)	3481 (57.05%)	507 (43.78%)	<0.001
Outcome
Day28los, (d)	28.00 [28.00, 28.00]	28.00 [28.00, 28.00]	9.63 [5.08, 16.16]	<0.001
Day28outcome, (%)	1158 (15.95%)	0 (0.00%)	1158 (100.00%)	<0.001
ICU los, (d)	4.16 [2.22, 8.70]	3.92 [2.13, 8.10]	6.07 [3.31, 10.76]	<0.001
ICU outcome, (%)	734 (10.11%)	60 (0.98%)	674 (58.20%)	<0.001
Hos los, (d)	10.07 [5.79, 19.20]	10.39 [5.96, 20.88]	8.86 [4.90, 14.67]	<0.001
Hos outcome, (%)	1165 (16.05%)	237 (3.88%)	928 (80.14%)	<0.001
