# Supplementary material for: Association of Glycemic Variability, Stress Hyperglycemia Ratio, and Hemoglobin Glycation Index With 28-Day Mortality in Sepsis: A Multicenter Retrospective Study With Mediation and Machine-Learning Analyses
Source: Research Square preprint supplement (doi:10.21203/rs.3.rs-8247079/v1), 2025-12-17
Supplement: Supplementary file 2 [file a403d92e321b2c80f666c04f.docx]

**Supplementary Figure S1.** Correlation between the hemoglobin glycation index (HGI) and hemoglobin A1c (HbA1c) in the two source databases.


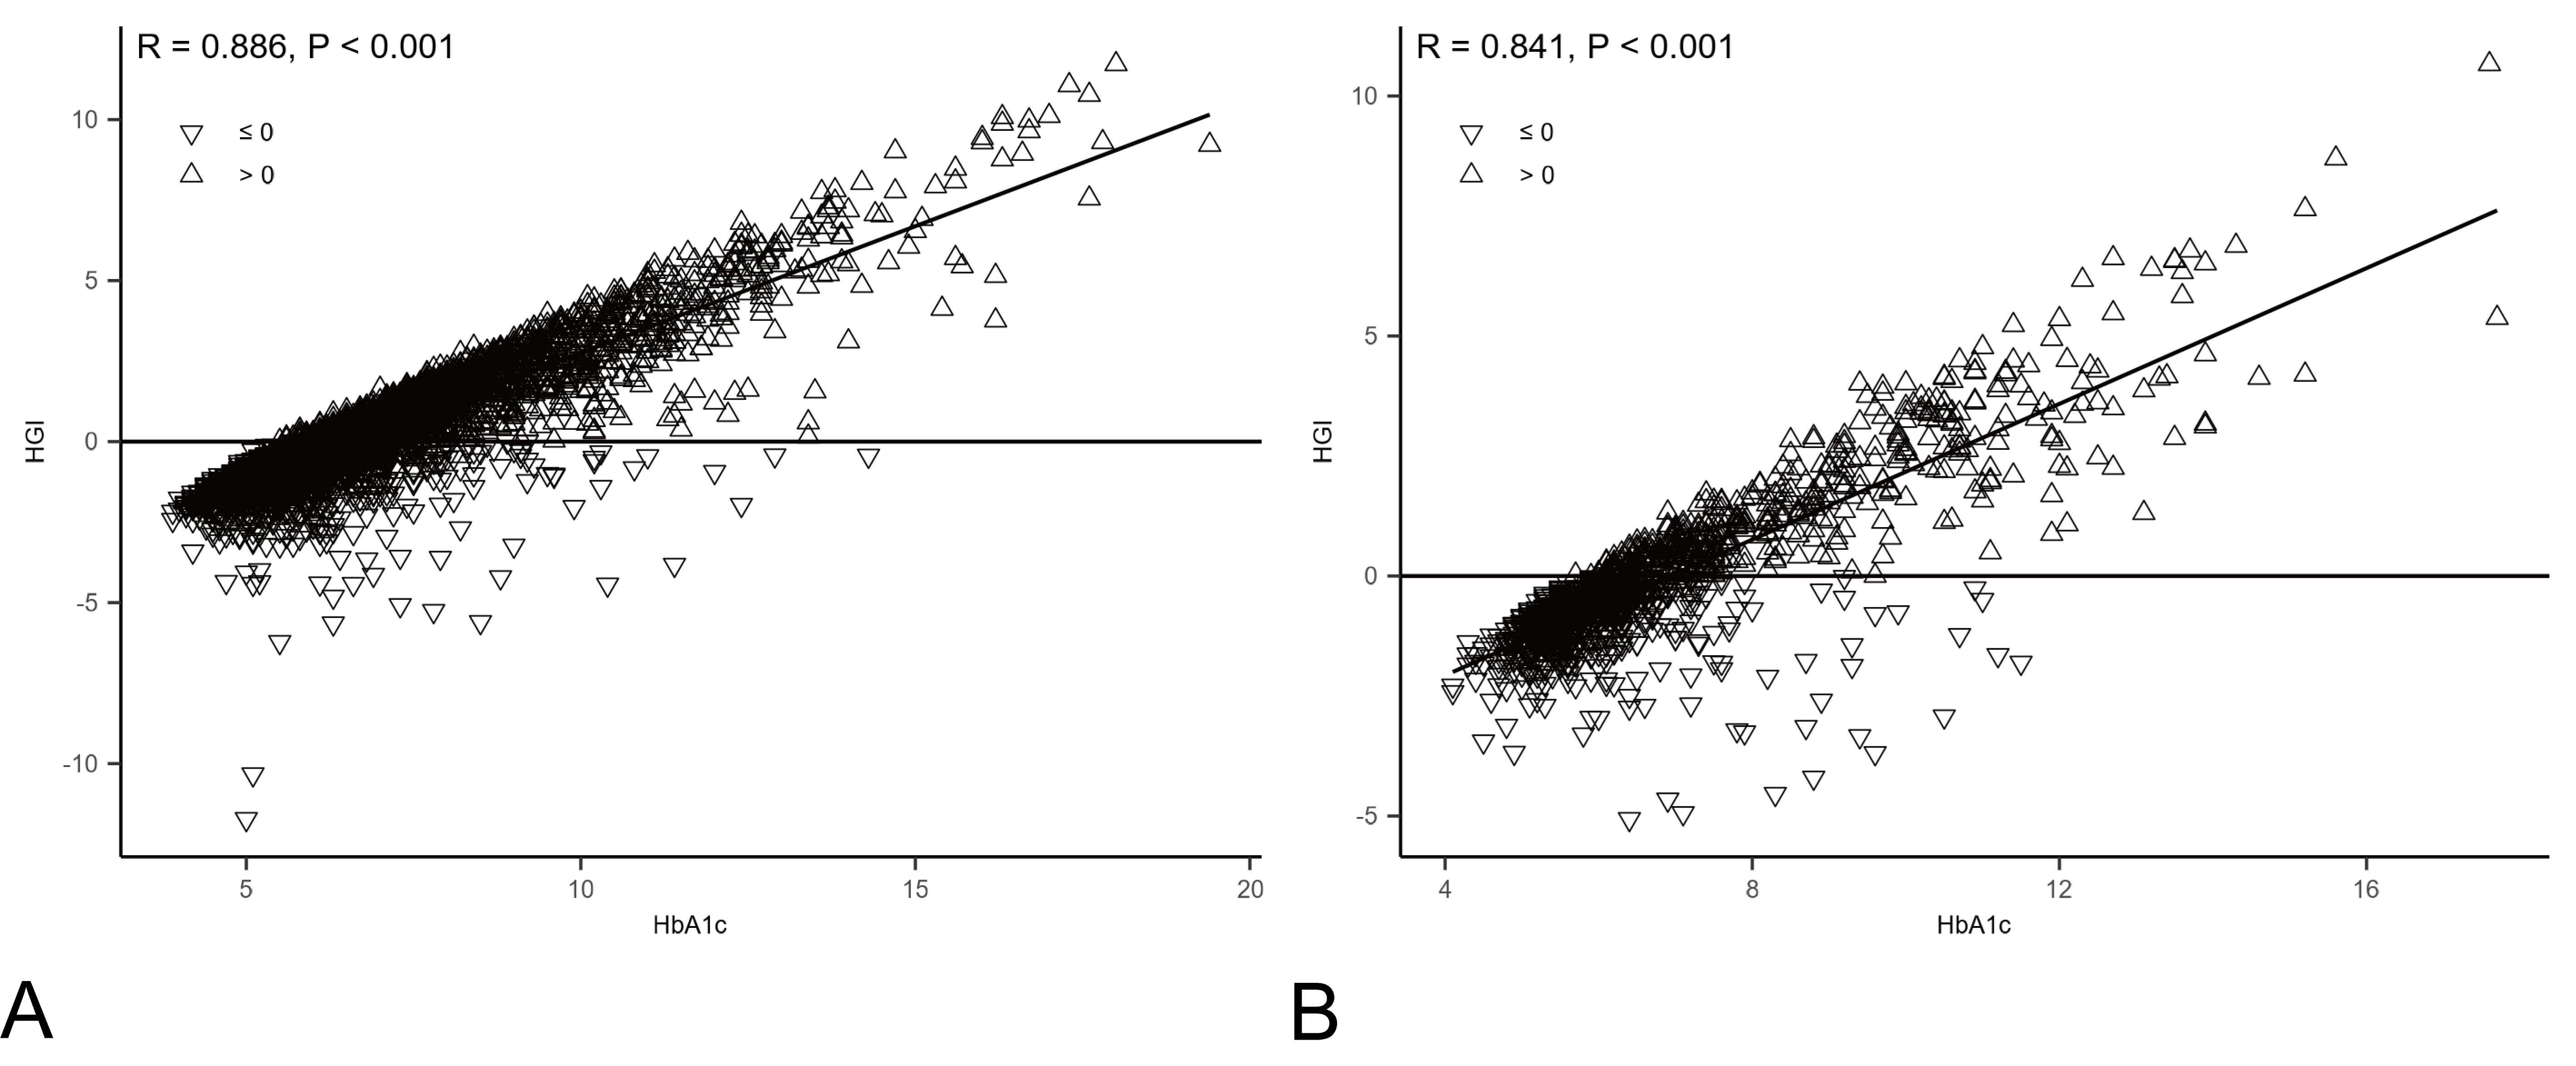


The scatter plots demonstrate the linear correlation between the measured hemoglobin A1c (HbA1c) levels and the calculated hemoglobin glycation index (HGI), stratified by the source database. (A) Correlation in the Medical Information Mart for Intensive Care IV (MIMIC-IV) cohort (n = 6,012). (B) Correlation in the Northwestern ICU (NWICU) cohort (n = 1,248).

*Abbreviations:* HbA1c, glycated hemoglobin A1c; HGI, hemoglobin glycation index

**Supplementary Table S1.** Mediation analysis of lactate in the association between glycemic metrics and 28-day mortality.

| **Effect** | **Model1** | **Model2** | **Model3** |
| --- | --- | --- | --- |
| **GV** |  |  |  |
| Indirect Effect (ACME) | -1.057 (-1.474, -0.717), p=<0.001 | -1.261 (-1.769, -0.830), p=<0.001 | -0.644 (-1.107, -0.276), p=<0.001 |
| Direct Effect (ADE) | -3.272 (-5.073, -1.819), p=<0.001 | -3.993 (-6.145, -2.296), p=<0.001 | -4.428 (-7.340, -2.051), p=<0.001 |
| Proportion Mediated | 24.5% (17.0%, 35.4%), p=<0.001 | 24.1% (17.0%, 34.3%), p=<0.001 | 12.8% (5.6%, 23.7%), p=<0.001 |
| **SHR** |  |  |  |
| Indirect Effect (ACME) | -25.106 (-34.509, -17.313), p=<0.001 | -30.491 (-42.523, -20.104), p=<0.001 | -14.789 (-24.538, -6.869), p=<0.001 |
| Direct Effect (ADE) | -65.016 (-92.017, -41.971), p=<0.001 | -85.719 (-119.119, -57.697), p=<0.001 | -61.781 (-103.969, -27.094), p=<0.001 |
| Proportion Mediated | 27.9% (20.4%, 37.2%), p=<0.001 | 26.2% (19.6%, 34.3%), p=<0.001 | 19.5% (9.4%, 36.2%), p=<0.001 |
| **HGI** |  |  |  |
| Indirect Effect (ACME) | 3.521 (2.224, 5.024), p=<0.001 | 4.428 (2.855, 6.279), p=<0.001 | 1.970 (0.876, 3.555), p=<0.001 |
| Direct Effect (ADE) | 24.255 (12.421, 37.019), p=<0.001 | 29.918 (14.996, 46.052), p=<0.001 | 22.340 (1.816, 44.692), p=0.024 |
| Proportion Mediated | 12.7% (7.7%, 22.0%), p=<0.001 | 12.9% (8.1%, 22.1%), p=<0.001 | 7.9% (2.9%, 41.7%), p=0.018 |

Data are presented as point estimates and 95% confidence intervals. The models correspond to the hierarchical adjustments used in the Cox regression analysis: Model 1 is unadjusted; Model 2 is partially adjusted for age, gender, and race; and Model 3 is the fully adjusted model.

*Abbreviations:* ACME, average causal mediation effect (indirect effect); ADE, average direct effect; CI, confidence interval; GV, Glycemic Variability; HGI, Hemoglobin Glycation Index; SHR, Stress Hyperglycemia Ratio.

**Supplementary Table S2.** Detailed results of feature selection using the Boruta algorithm.

| **Feature** | **Mean Imp** | **Median Imp** | **Norm Hits** | **Decision** |
| --- | --- | --- | --- | --- |
| Stroke | 28.06424386 | 28.04998271 | 1 | Confirmed |
| FBG | 18.74013227 | 18.81524248 | 1 | Confirmed |
| Age | 18.68012854 | 18.69258989 | 1 | Confirmed |
| Insulin | 18.16568444 | 18.12831113 | 1 | Confirmed |
| SHR | 16.81412766 | 16.74017013 | 1 | Confirmed |
| Lac | 16.55835921 | 16.54235701 | 1 | Confirmed |
| Plt | 15.41275984 | 15.39873054 | 1 | Confirmed |
| HGI | 14.72557117 | 14.78309614 | 1 | Confirmed |
| HR | 13.87067162 | 13.91343182 | 1 | Confirmed |
| GV | 13.31518616 | 13.26811869 | 1 | Confirmed |
| Cre | 13.00669778 | 13.05741376 | 1 | Confirmed |
| Temperature | 11.35966802 | 11.40517566 | 1 | Confirmed |
| Hb | 11.24007791 | 11.22968794 | 1 | Confirmed |
| Hba1c | 10.6331054 | 10.68389731 | 1 | Confirmed |
| Tbil | 9.703138549 | 9.672206734 | 1 | Confirmed |
| Wbc | 9.427091636 | 9.503153446 | 1 | Confirmed |
| ALT | 9.152738819 | 9.14389805 | 1 | Confirmed |
| AST | 8.414586874 | 8.337124805 | 1 | Confirmed |
| RRT | 7.407581104 | 7.465601125 | 1 | Confirmed |
| MAP | 7.119085096 | 7.154110194 | 1 | Confirmed |
| Vaso | 6.569088527 | 6.612054758 | 1 | Confirmed |
| RR | 5.85697993 | 5.855446168 | 1 | Confirmed |
| BMI | 5.776069836 | 5.768241208 | 0.994974874 | Confirmed |
| MV | 4.101219592 | 4.122022192 | 0.969849246 | Confirmed |
| COPD | 3.681670515 | 3.640747977 | 0.889447236 | Confirmed |
| Race | 2.250644188 | 2.228841073 | 0.507537688 | Tentative |
| Diabetes | 1.555128247 | 1.623147633 | 0.100502513 | Rejected |
| Hypertension | 0.556388103 | 0.733884751 | 0 | Rejected |
| HF | 0.796455944 | 0.72736725 | 0.010050251 | Rejected |
| Gender | 0.680750824 | 0.652439508 | 0.010050251 | Rejected |

The table displays the importance metrics for each feature evaluated by the Boruta algorithm. Features are ranked based on their mean importance Z-score. The 'Decision' column indicates whether a feature was classified as 'Confirmed' (important), 'Tentative', or 'Rejected'. Only 'Confirmed' and 'Tentative' features were considered for inclusion in the final feature set.

**Supplementary Table S3.** Non-zero coefficients of features selected by the LASSO regression model.

| **Feature Raw Name** | **Coefficient lambda min** |
| --- | --- |
| Stroke1 | 1.168770762 |
| RaceOther | 0.522167582 |
| Insulin1 | -0.487429397 |
| Hypertension1 | -0.410856991 |
| COPD1 | 0.325633358 |
| SHR | 0.170723413 |
| RRT1 | 0.169962957 |
| Cre | 0.104356154 |
| MV1 | 0.102604916 |
| Tbil | 0.093939667 |
| Lac | 0.087641587 |
| RaceBlack | -0.086002121 |
| Temperature | 0.05041656 |
| HF1 | 0.045504017 |
| Hb | 0.040216978 |
| Age | 0.03106115 |
| RR | 0.025653086 |
| Hba1c | 0.018380181 |
| Wbc | 0.014243218 |
| Vaso1 | -0.01115776 |
| Diabetes1 | 0.010265172 |
| GV | 0.008920237 |
| BMI | -0.007402096 |
| HR | 0.006859695 |
| MAP | -0.006429205 |
| Plt | 0.000868782 |
| AST | 0.00014925 |
| FBG | 0 |
| HGI | 0 |
| GenderM | 0 |
| RaceWhite | 0 |
| ALT | 0 |

The table lists all features that retained a non-zero coefficient at the optimal lambda (lambda.min) value determined by ten-fold cross-validation. These features were considered important by the LASSO model and were included in the final feature set.

**Supplementary Table S4.** Detailed performance metrics of the twelve machine learning models on the validation set.

| Model | Auc | Accuracy | Sensitivity | Specificity | Precision | Recall | Fbeta | Mcc |
| --- | --- | --- | --- | --- | --- | --- | --- | --- |
| XGBoost | 0.797900852 | 0.832033043 | 0.070460705 | 0.987292818 | 0.530612245 | 0.070460705 | 0.124401914 | 0.146097608 |
| BART | 0.787986046 | 0.830656264 | 0.070460705 | 0.985635359 | 0.5 | 0.070460705 | 0.123515439 | 0.137847674 |
| GBM | 0.787550345 | 0.835245525 | 0.111111111 | 0.982872928 | 0.569444444 | 0.111111111 | 0.185941043 | 0.197200522 |
| Random Forest | 0.779689769 | 0.83111519 | 0.002710027 | 1 | 1 | 0.002710027 | 0.005405405 | 0.04745666 |
| LightGBM | 0.775811885 | 0.830197338 | 0.078590786 | 0.983425414 | 0.491525424 | 0.078590786 | 0.135514019 | 0.143305774 |
| Logistic Regression | 0.749803111 | 0.831574117 | 0.075880759 | 0.985635359 | 0.518518519 | 0.075880759 | 0.132387707 | 0.148410642 |
| GLMBoost | 0.746118373 | 0.832033043 | 0.01897019 | 0.997790055 | 0.636363636 | 0.01897019 | 0.036842105 | 0.088696575 |
| Nnet | 0.733355043 | 0.820100964 | 0.154471545 | 0.955801105 | 0.416058394 | 0.154471545 | 0.225296443 | 0.170385302 |
| SVM | 0.722864544 | 0.827902708 | 0.024390244 | 0.991712707 | 0.375 | 0.024390244 | 0.045801527 | 0.057866696 |
| Naïve Bayes | 0.709881118 | 0.762276274 | 0.341463415 | 0.848066298 | 0.314214464 | 0.341463415 | 0.327272727 | 0.183439015 |
| Rpart | 0.679086376 | 0.807709959 | 0.146341463 | 0.942541436 | 0.341772152 | 0.146341463 | 0.204933586 | 0.128546124 |
| K-NN | 0.677232029 | 0.829279486 | 0.040650407 | 0.990055249 | 0.454545455 | 0.040650407 | 0.074626866 | 0.094297246 |

The table presents a comprehensive comparison of the performance of all evaluated machine learning models. Performance was assessed on the independent validation set.

*Abbreviations:* AUC, Area Under the Curve; Mcc, Matthews Correlation Coefficient.

**Supplementary Table S5. Sensitivity analysis: Multivariable Cox proportional hazards regression analysis of the association between quintiles of GV, SHR, and HGI and 28-day all-cause mortality using Random Forest imputation.**

| **Variable** | **Model 1** | | **Model 2** | | **Model 3** | |
| --- | --- | --- | --- | --- | --- | --- |
| **HR (95% CI)** | ***P* value** | **HR (95% CI)** | ***P* value** | **HR (95% CI)** | ***P* value** |
| **GV** |  |  |  |  |  |  |
| Q2 vs Q1 | 0.98 (0.8–1.2) | 0.833 | 0.97 (0.79–1.19) | 0.783 | 0.91 (0.74–1.12) | 0.367 |
| Q3 vs Q1 | 1.17 (0.96–1.42) | 0.124 | 1.15 (0.95–1.4) | 0.158 | 1.15 (0.94–1.41) | 0.164 |
| Q4 vs Q1 | 1.29 (1.06–1.56) | **<0.05** | 1.29 (1.06–1.56) | **<0.05** | 1.25 (1.02–1.53) | **<0.05** |
| Q5 vs Q1 | 1.76 (1.46–2.11) | **<0.05** | 1.82 (1.52–2.18) | **<0.05** | 1.63 (1.34–1.98) | **<0.05** |
| **SHR** |  |  |  |  |  |  |
| Q2 vs Q1 | 1.04 (0.85–1.28) | 0.7 | 1.03 (0.84–1.27) | 0.783 | 1.01 (0.82–1.24) | 0.959 |
| Q3 vs Q1 | 1.09 (0.89–1.34) | 0.4 | 1.1 (0.89–1.35) | 0.367 | 0.99 (0.81–1.22) | 0.891 |
| Q4 vs Q1 | 1.5 (1.24–1.82) | **<0.05** | 1.52 (1.25–1.84) | **<0.05** | 1.26 (1.04–1.53) | **<0.05** |
| Q5 vs Q1 | 2.04 (1.7–2.45) | **<0.05** | 2.1 (1.75–2.53) | **<0.05** | 1.5 (1.24–1.81) | **<0.05** |
| **HGI** |  |  |  |  |  |  |
| Q2 vs Q1 | 0.59 (0.49–0.7) | **<0.05** | 0.55 (0.46–0.66) | **<0.05** | 0.69 (0.57–0.83) | **<0.05** |
| Q3 vs Q1 | 0.68 (0.58–0.81) | **<0.05** | 0.62 (0.52–0.73) | **<0.05** | 0.83 (0.69–0.99) | **<0.05** |
| Q4 vs Q1 | 0.68 (0.57–0.81) | **<0.05** | 0.6 (0.5–0.71) | **<0.05** | 0.8 (0.67–0.96) | **<0.05** |
| Q5 vs Q1 | 0.57 (0.48–0.68) | **<0.05** | 0.55 (0.46–0.66) | **<0.05** | 0.74 (0.61–0.9) | **<0.05** |

Model 1 was unadjusted.

Model 2 was partially adjusted for age, gender, and race.

Model 3 was fully adjusted for the variables in Model 2 plus Body Mass Index (BMI), severity of illness scores (SOFA, OASIS, Charlson Comorbidity Index), comorbidities (hypertension, diabetes, COPD, stroke, heart failure), vital signs (mean arterial pressure, heart rate, respiratory rate, temperature), laboratory results (hemoglobin, white blood cell count, platelet count, total bilirubin, AST, ALT, creatinine), interventions (mechanical ventilation, vasopressor use, renal replacement therapy, insulin use), and database source.

*Abbreviations:* GV, Glycemic Variability; HGI, Hemoglobin Glycation Index; SHR, Stress Hyperglycemia Ratio.
