# Supplementary material for: Association of Glycemic Variability, Stress Hyperglycemia Ratio, and Hemoglobin Glycation Index With 28-Day Mortality in Sepsis: A Multicenter Retrospective Study With Mediation and Machine-Learning Analyses
Source: Research Square preprint supplement (doi:10.21203/rs.3.rs-8247079/v1), 2025-12-17
Supplement: Supplementary file 3 [file aec14cb559388f511c818b67.xlsx]

## Sheet: Sheet1
Variable	Model 1		Model 2		Model 3
	HR (95% CI)	P value	HR (95% CI)	P value	HR (95% CI)	P value
GV
Q2 vs Q1	0.98 (0.8–1.2)	0.833	0.97 (0.79–1.19)	0.783	0.91 (0.74–1.12)	0.368
Q3 vs Q1	1.17 (0.96–1.42)	0.124	1.15 (0.95–1.4)	0.158	1.15 (0.94–1.41)	0.164
Q4 vs Q1	1.3 (1.07–1.57)	<0.05	1.29 (1.07–1.57)	<0.05	1.25 (1.03–1.53)	<0.05
Q5 vs Q1	1.75 (1.46–2.1)	<0.05	1.81 (1.51–2.17)	<0.05	1.62 (1.33–1.97)	<0.05
SHR
Q2 vs Q1	1.05 (0.86–1.3)	0.615	1.04 (0.85–1.29)	0.682	1.02 (0.83–1.26)	0.856
Q3 vs Q1	1.1 (0.89–1.35)	0.368	1.11 (0.9–1.36)	0.335	0.99 (0.81–1.22)	0.954
Q4 vs Q1	1.52 (1.25–1.84)	<0.05	1.54 (1.27–1.86)	<0.05	1.26 (1.04–1.53)	<0.05
Q5 vs Q1	2.05 (1.7–2.46)	<0.05	2.11 (1.76–2.54)	<0.05	1.51 (1.25–1.82)	<0.05
HGI
Q2 vs Q1	0.59 (0.49–0.7)	<0.05	0.55 (0.46–0.66)	<0.05	0.69 (0.57–0.82)	<0.05
Q3 vs Q1	0.68 (0.58–0.81)	<0.05	0.62 (0.52–0.73)	<0.05	0.83 (0.69–0.99)	<0.05
Q4 vs Q1	0.68 (0.57–0.81)	<0.05	0.6 (0.5–0.71)	<0.05	0.8 (0.67–0.96)	<0.05
Q5 vs Q1	0.57 (0.48–0.68)	<0.05	0.55 (0.46–0.66)	<0.05	0.74 (0.61–0.91)	<0.05
